# Supplementary material
Source: HighWire-hosted journal article supplement (https://msystems.asm.org/content/5/2/e00736-19)

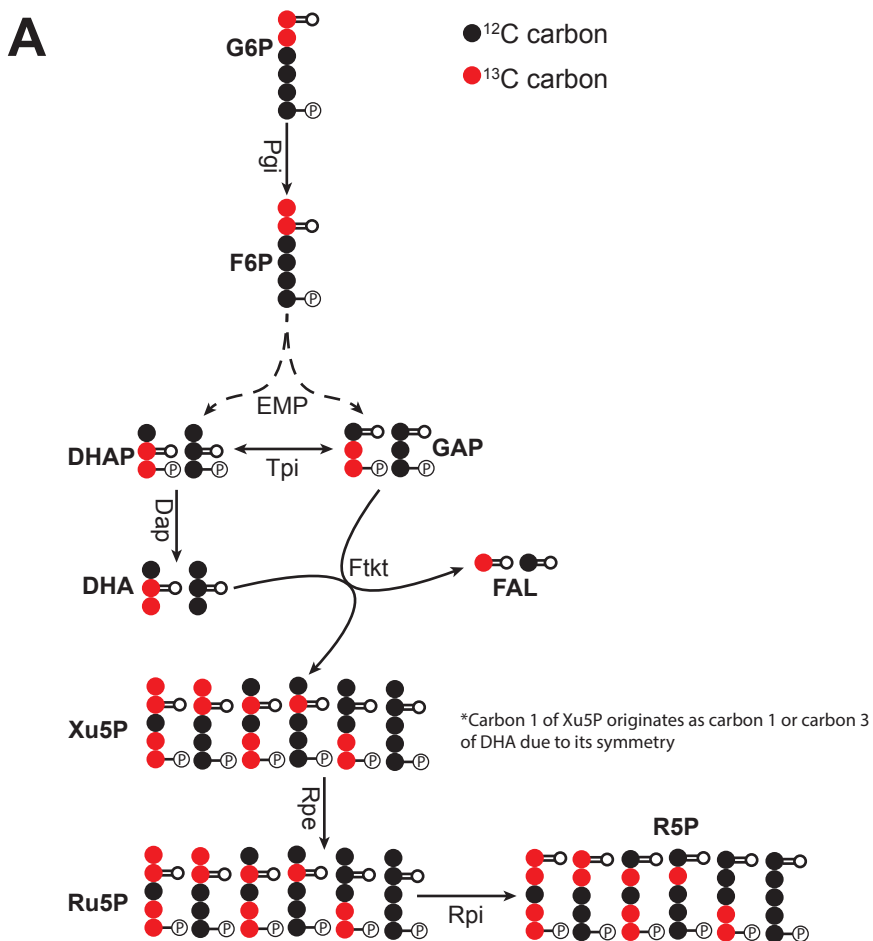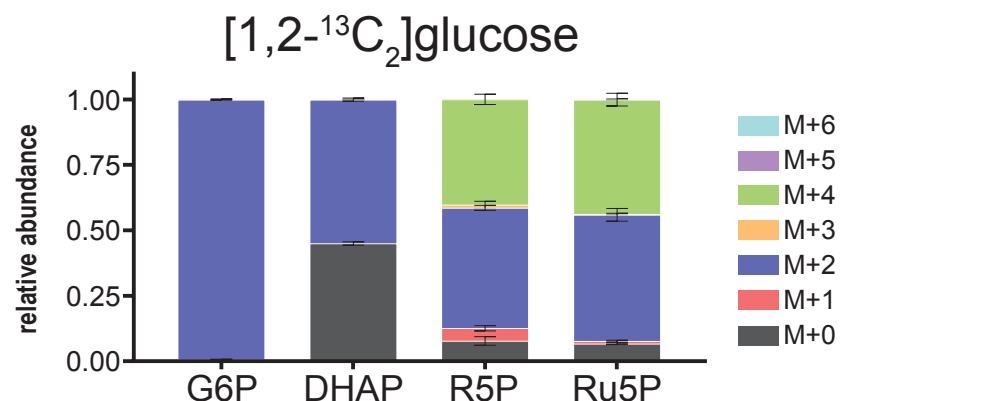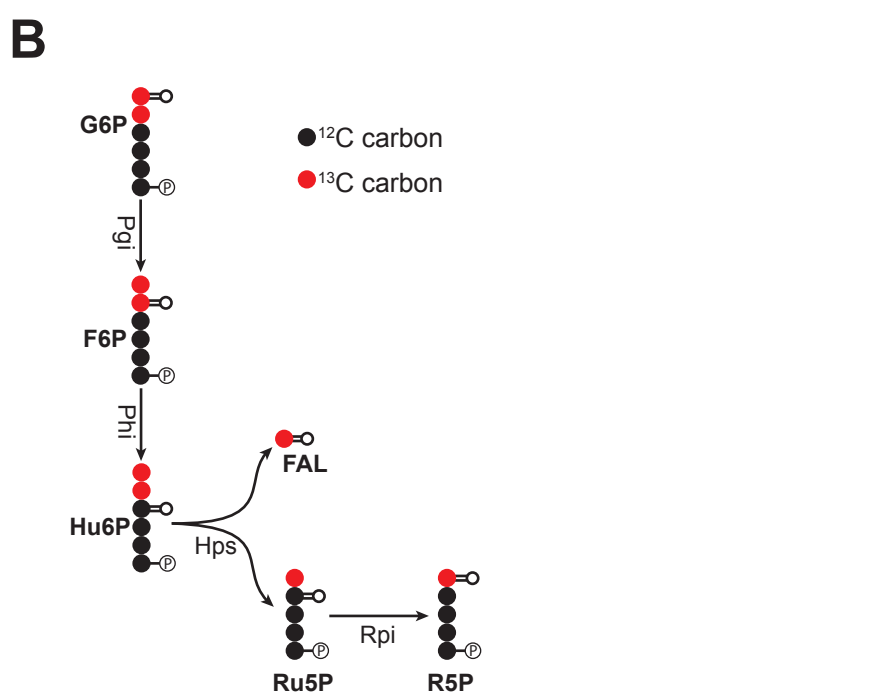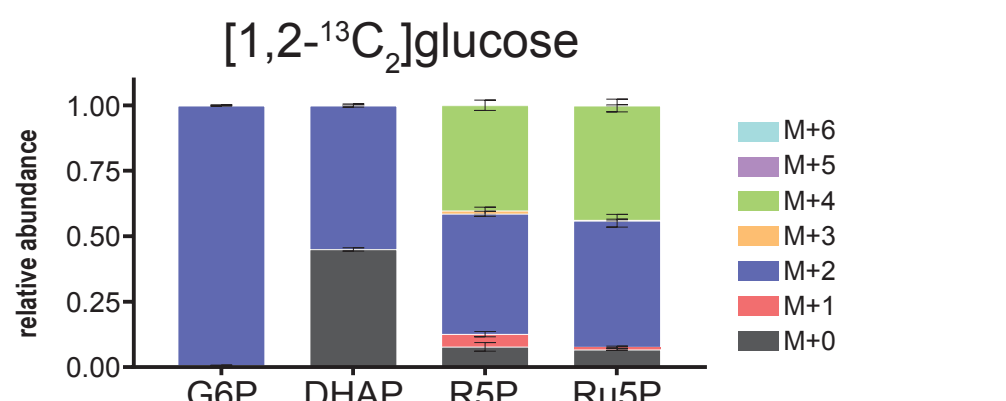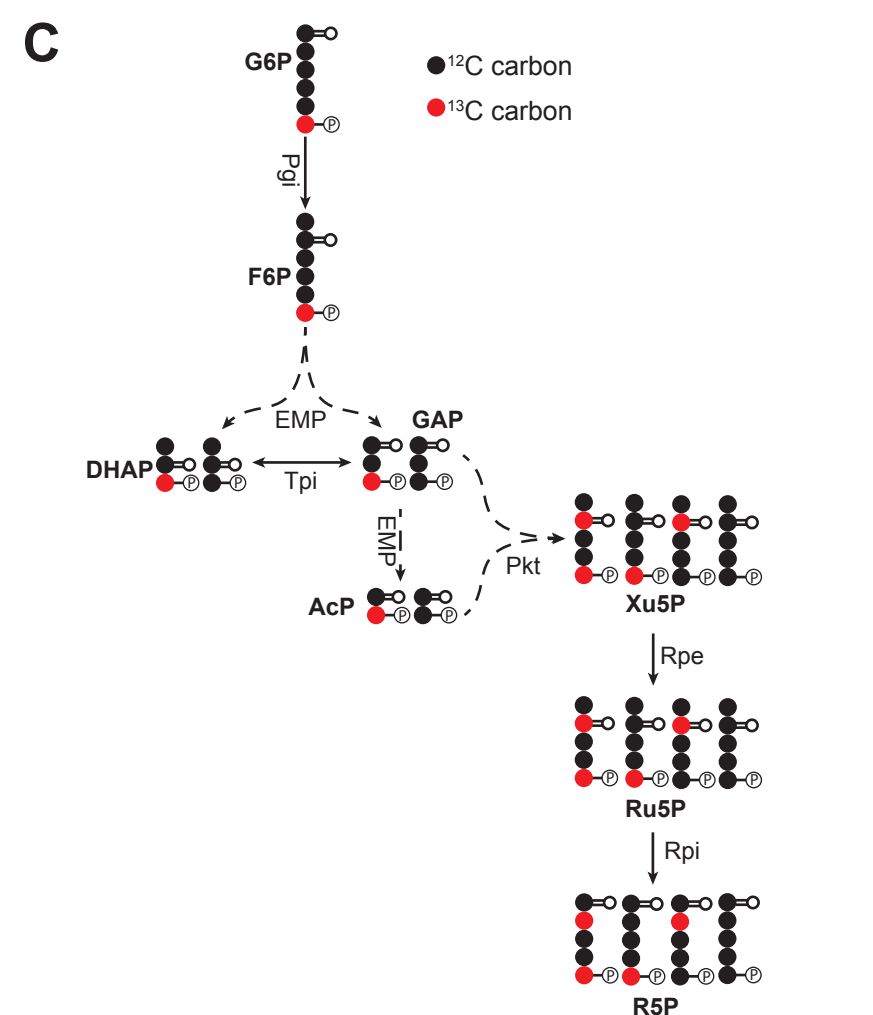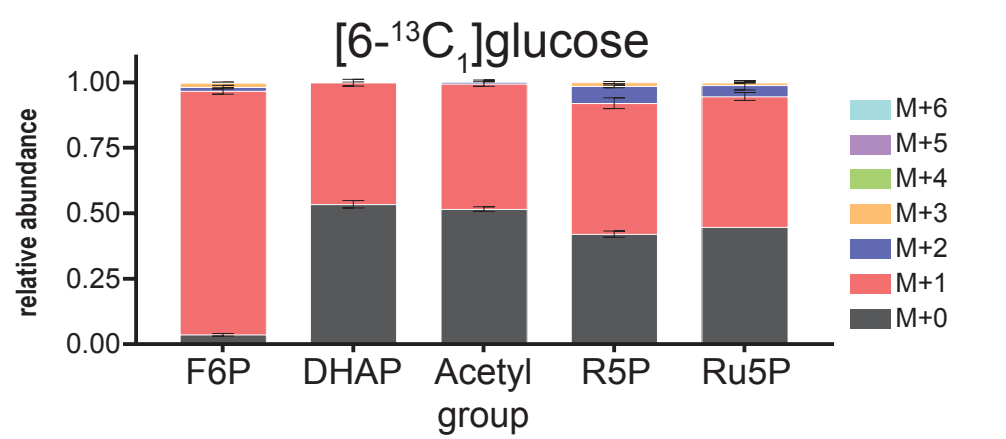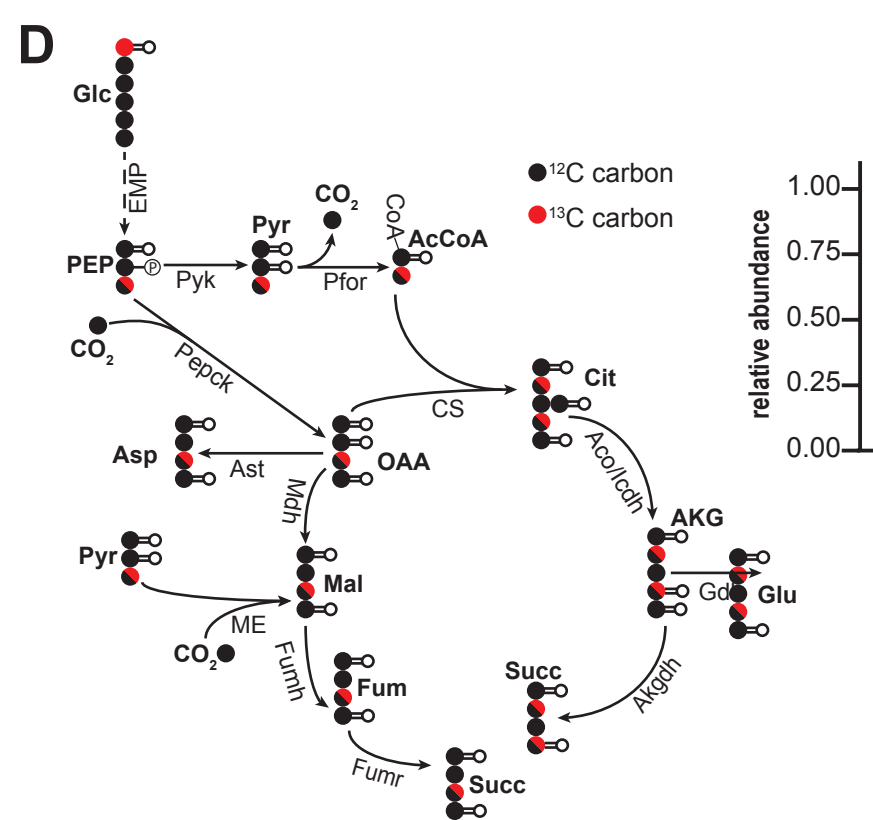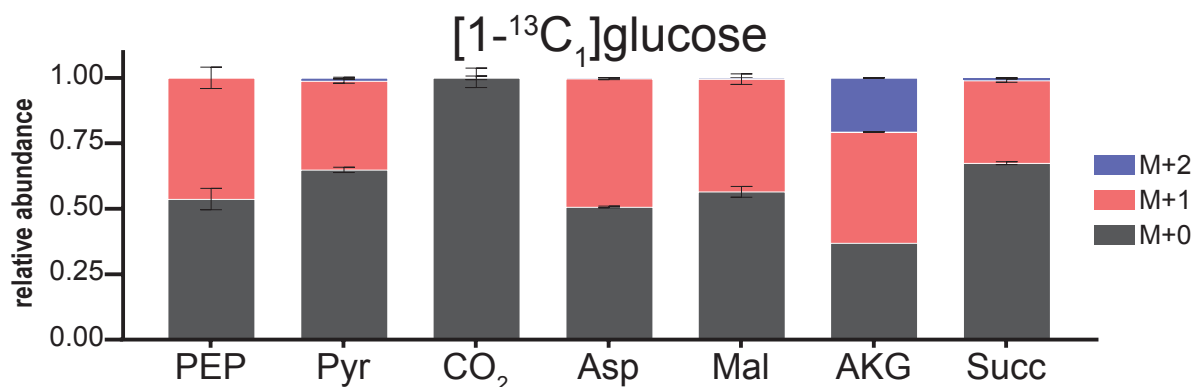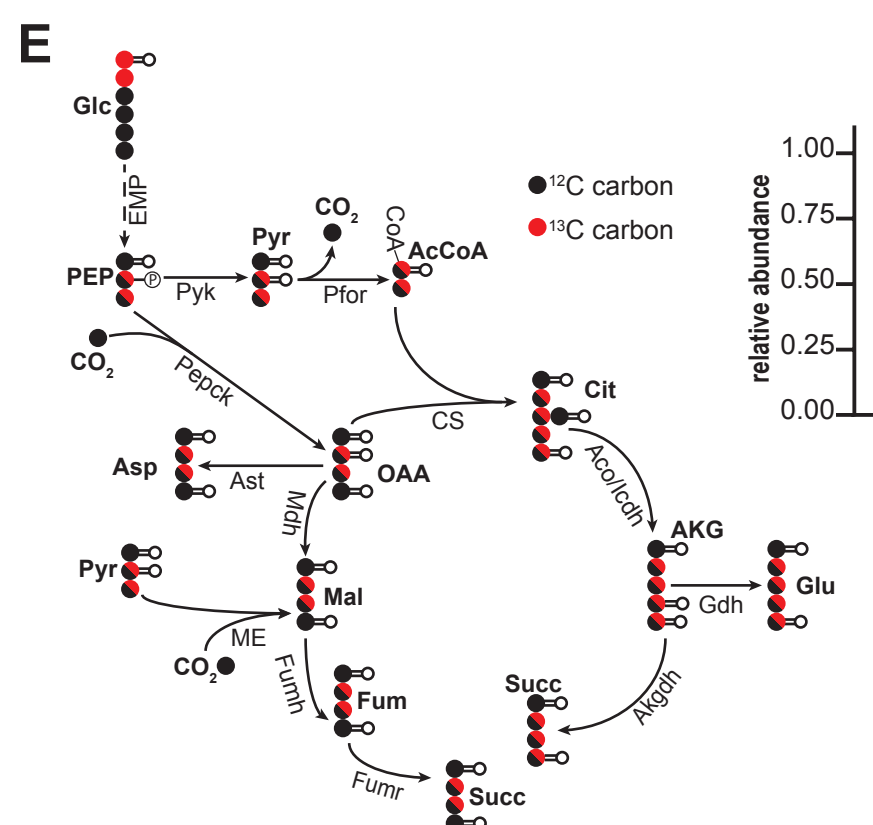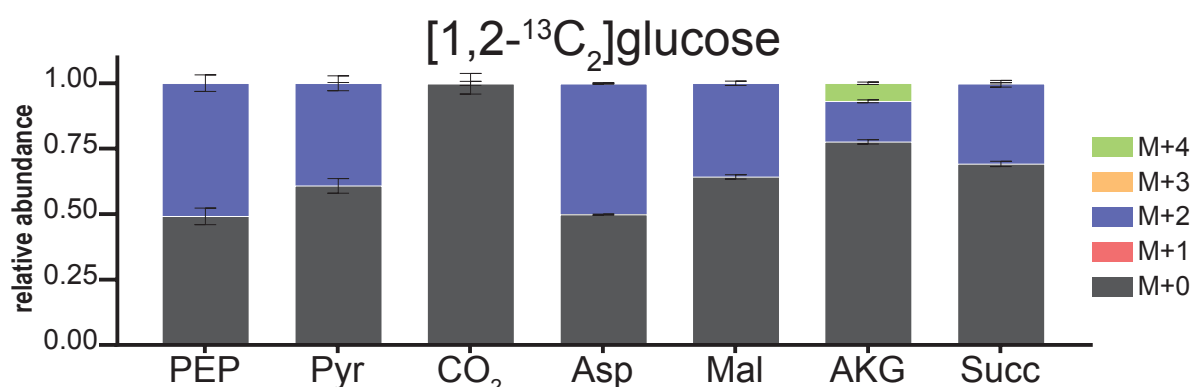

Supplement: inline-supplementary-material-2 [file inline-supplementary-material-2.pdf]
